# Supplementary material
Source: publisher figshare collection journal article supplement (https://acs.figshare.com/ndownloader/files/25726641)
Supplement: Supplementary file 1 [file 25726641]

## Sheet: H2_FCI
ref-fit basis	ErrF	Vne rel	Jee rel	Vne rel	Jee rel		ref-fit basis	ErrF	Vne rel	Jee rel	Vne rel	Jee rel
pc0_pc0	8.01776e-05	-0.00104872	-0.00115111	0.00104872	0.00115111		apc0_apc0	8.02923e-05	-0.000660638	-0.000683642	0.000660638	0.000683642
pc0_pc1	0.00161056	-0.00713365	-0.00489263	0.00713365	0.00489263		apc0_apc1	0.00139429	-0.00295591	0.00100552	0.00295591	0.00100552
pc0_pc2	7.92519e-05	0.00363861	0.00220746	0.00363861	0.00220746		apc0_apc2	5.28868e-05	0.00301725	0.00161191	0.00301725	0.00161191
pc0_pc3	4.17022e-06	0.000463861	3.66541e-05	0.000463861	3.66541e-05		apc0_apc3	3.92585e-06	0.000358247	-2.41132e-06	0.000358247	2.41132e-06
pc0_pc4	1.14975e-07	-9.28344e-05	-2.21894e-05	9.28344e-05	2.21894e-05
pc1_pc0	0.00300184	0.00644724	0.00751729	0.00644724	0.00751729		apc1_apc0	0.00298548	0.00164102	0.00254187	0.00164102	0.00254187
pc1_pc1	9.75018e-06	-1.80723e-06	-0.000254629	1.80723e-06	0.000254629		apc1_apc1	5.93806e-06	0.000218095	0.00010621	0.000218095	0.00010621
pc1_pc2	0.000140473	-0.000775799	-0.0010336	0.000775799	0.0010336		apc1_apc2	4.85533e-05	0.00128801	0.00118257	0.00128801	0.00118257
pc1_pc3	6.4292e-06	-4.43604e-05	0.000175787	4.43604e-05	0.000175787		apc1_apc3	4.48469e-06	0.00013297	0.00026577	0.00013297	0.00026577
pc1_pc4	1.2237e-07	0.000129063	1.95678e-05	0.000129063	1.95678e-05
pc2_pc0	0.00379134	0.0106666	0.0125336	0.0106666	0.0125336		apc2_apc0	0.00334151	0.00378713	0.00530797	0.00378713	0.00530797
pc2_pc1	0.000285336	0.00278742	0.0035545	0.00278742	0.0035545		apc2_apc1	0.000161411	0.00057801	-7.70658e-05	0.00057801	7.70658e-05
pc2_pc2	1.17961e-07	2.49763e-05	4.59574e-06	2.49763e-05	4.59574e-06		apc2_apc2	1.11239e-07	3.08109e-05	1.23633e-05	3.08109e-05	1.23633e-05
pc2_pc3	3.26187e-06	-0.000340942	-6.33923e-05	0.000340942	6.33923e-05		apc2_apc3	1.24757e-06	-6.57978e-05	4.89801e-05	6.57978e-05	4.89801e-05
pc2_pc4	2.51206e-07	8.08296e-05	3.60976e-05	8.08296e-05	3.60976e-05
pc3_pc0	0.00396863	0.0108636	0.0129352	0.0108636	0.0129352		apc3_apc0	0.00343186	0.00400719	0.0055075	0.00400719	0.0055075
pc3_pc1	0.000374125	0.00298815	0.00399208	0.00298815	0.00399208		apc3_apc1	0.000159512	0.000328767	-7.77091e-05	0.000328767	7.77091e-05
pc3_pc2	1.59907e-05	0.000761916	0.000559619	0.000761916	0.000559619		apc3_apc2	6.76207e-06	0.000319345	0.000106018	0.000319345	0.000106018
pc3_pc3	7.16537e-09	-6.5711e-06	-4.77215e-06	6.5711e-06	4.77215e-06		apc3_apc3	4.74733e-09	2.84996e-06	-1.46365e-07	2.84996e-06	1.46365e-07
pc3_pc4	3.44196e-08	-7.60612e-05	-2.20088e-05	7.60612e-05	2.20088e-05
pc4_pc0	0.00399336	0.0109028	0.0129842	0.0109028	0.0129842		pc0_apc0	7.92405e-05	-0.000641007	-0.000651158	0.000641007	0.000651158
pc4_pc1	0.000380284	0.00298767	0.00401195	0.00298767	0.00401195		pc1_apc1	6.20075e-06	0.000225112	0.000107096	0.000225112	0.000107096
pc4_pc2	1.72583e-05	0.000748908	0.00056605	0.000748908	0.00056605		pc2_apc2	9.35661e-08	2.99184e-05	1.22018e-05	2.99184e-05	1.22018e-05
pc4_pc3	1.98043e-07	-5.04878e-05	-1.91545e-05	5.04878e-05	1.91545e-05		pc3_apc3	5.30852e-09	2.2941e-06	-4.62405e-07	2.2941e-06	4.62405e-07
pc4_pc4	6.38303e-10	5.51392e-07	-5.22946e-07	5.51392e-07	5.22946e-07
svp_svp	5.86892e-06	-0.000243965	-0.0003777	0.000243965	0.0003777
svp_tzp	0.000238894	-0.00208163	-0.00132613	0.00208163	0.00132613
svp_qzp	9.43275e-06	0.00230626	0.000910524	0.00230626	0.000910524
tzp_svp	0.000304189	0.00180715	0.00187368	0.00180715	0.00187368
tzp_tzp	9.19283e-08	-5.27147e-05	-3.36022e-05	5.27147e-05	3.36022e-05
tzp_qzp	1.84935e-05	-0.00136583	-0.000431494	0.00136583	0.000431494
qzp_svp	0.000294359	0.00242414	0.00254144	0.00242414	0.00254144
qzp_tzp	3.1014e-05	0.000829652	0.000656179	0.000829652	0.000656179
qzp_qzp	3.34718e-09	-7.50358e-06	-7.55178e-06	7.50358e-06	7.55178e-06
ccd_ccd	4.38856e-06	-0.000324219	-0.000379787	0.000324219	0.000379787		accd_accd	1.9173e-06	-1.26991e-05	9.63129e-05	1.26991e-05	9.63129e-05
ccd_cct	0.000248586	-0.00204448	-0.00131789	0.00204448	0.00131789		accd_acct	8.99963e-05	-0.00041068	0.000935593	0.00041068	0.000935593
ccd_ccq	1.33432e-05	0.000815256	0.00112249	0.000815256	0.00112249		accd_accq	1.97716e-06	-0.000454924	5.22857e-06	0.000454924	5.22857e-06
ccd_cc5	1.35322e-06	0.000548712	0.000337258	0.000548712	0.000337258
cct_ccd	0.000340251	0.00215877	0.00209675	0.00215877	0.00209675		acct_accd	0.000338118	0.000865182	-6.30906e-06	0.000865182	6.30906e-06
cct_cct	9.18457e-08	-5.33255e-05	-3.40612e-05	5.33255e-05	3.40612e-05		acct_acct	2.74918e-08	-2.36555e-05	-3.27941e-06	2.36555e-05	3.27941e-06
cct_ccq	2.42744e-05	-0.000131322	-0.000384551	0.000131322	0.000384551		acct_accq	1.52167e-05	0.000507944	0.000231931	0.000507944	0.000231931
cct_cc5	1.06353e-06	0.000702612	0.00025413	0.000702612	0.00025413
ccq_ccd	0.000326288	0.00272471	0.00264832	0.00272471	0.00264832		accq_accd	0.000254431	0.00109285	0.000269993	0.00109285	0.000269993
ccq_cct	3.28581e-05	0.000541998	0.000417436	0.000541998	0.000417436		accq_acct	3.18435e-05	0.000181841	9.81502e-05	0.000181841	9.81502e-05
ccq_ccq	3.85346e-09	-4.59034e-06	-2.86415e-06	4.59034e-06	2.86415e-06		accq_accq	8.35143e-10	-3.24131e-06	-1.76136e-06	3.24131e-06	1.76136e-06
ccq_cc5	2.19716e-07	-0.000106877	1.48083e-05	0.000106877	1.48083e-05
cc5_ccd	0.000313856	0.00268964	0.0027415	0.00268964	0.0027415		ccd_accd	1.95229e-06	-2.27119e-05	7.65748e-05	2.27119e-05	7.65748e-05
cc5_cct	2.93581e-05	0.000843393	0.00069256	0.000843393	0.00069256		cct_acct	4.40406e-08	-2.76741e-05	-1.92352e-06	2.76741e-05	1.92352e-06
cc5_ccq	3.9543e-06	0.000597943	0.000336703	0.000597943	0.000336703		ccq_accq	1.95539e-09	-1.34206e-06	2.22251e-07	1.34206e-06	2.22251e-07
cc5_cc5	7.19924e-10	-3.46546e-06	-2.56782e-06	3.46546e-06	2.56782e-06
svp_svp_ri	0.00103211	-0.00565882	-0.0124908	0.00565882	0.0124908
tzp_tzp_ri	0.000587855	-0.00656327	-0.010971	0.00656327	0.010971
ccd_ccd_ri	0.00422215	-0.0163997	-0.0322892	0.0163997	0.0322892
cct_cct_ri	0.000949243	-0.00783564	-0.0141024	0.00783564	0.0141024
ccq_ccq_ri	0.000120795	-0.00539451	-0.00502635	0.00539451	0.00502635

## Sheet: Be_FCI
ref-fit basis	ErrF	Vne rel	Jee rel	Vne rel	Jee rel
pc0_pc0	5.134e-05	-0.00109302	5.39779e-05	0.00109302	5.39779e-05
pc0_pc1	0.00384471	0.0288734	0.0241983	0.0288734	0.0241983
pc0_pc2	1.07701e-05	-0.000778402	0.000276206	0.000778402	0.000276206
pc0_pc3	2.53718e-07	-0.000121696	3.23916e-05	0.000121696	3.23916e-05
pc0_pc4	4.46972e-11	-7.76459e-06	9.1352e-07	7.76459e-06	9.1352e-07
pc1_pc0	0.00411204	-0.0347652	-0.0291068	0.0347652	0.0291068
pc1_pc1	1.66236e-05	6.51912e-05	0.00103288	6.51912e-05	0.00103288
pc1_pc2	7.10317e-06	0.00176698	0.00101125	0.00176698	0.00101125
pc1_pc3	8.01374e-08	0.000143872	4.61388e-05	0.000143872	4.61388e-05
pc1_pc4	3.89441e-10	1.37586e-05	2.00957e-06	1.37586e-05	2.00957e-06
pc2_pc0	0.00262431	-0.0302813	-0.0265299	0.0302813	0.0265299
pc2_pc1	0.000245948	0.00608914	0.00558226	0.00608914	0.00558226
pc2_pc2	1.28438e-08	-6.16288e-05	-2.27007e-05	6.16288e-05	2.27007e-05
pc2_pc3	4.27938e-08	0.000209496	5.83208e-05	0.000209496	5.83208e-05
pc2_pc4	8.26832e-10	4.10486e-05	6.75728e-06	4.10486e-05	6.75728e-06
pc3_pc0	0.0029729	-0.0330365	-0.029437	0.0330365	0.029437
pc3_pc1	0.000141145	0.0046437	0.00454988	0.0046437	0.00454988
pc3_pc2	2.71926e-06	0.00119257	0.000609094	0.00119257	0.000609094
pc3_pc3	8.37336e-12	-5.59301e-07	7.9729e-07	5.59301e-07	7.9729e-07
pc3_pc4	5.65919e-10	1.39586e-05	4.85843e-06	1.39586e-05	4.85843e-06
pc4_pc0	0.00297638	-0.0330755	-0.029468	0.0330755	0.029468
pc4_pc1	0.00014156	0.00455371	0.00445179	0.00455371	0.00445179
pc4_pc2	1.95844e-06	0.00100571	0.000509063	0.00100571	0.000509063
pc4_pc3	9.2661e-09	6.82743e-05	1.72004e-05	6.82743e-05	1.72004e-05
pc4_pc4	8.21038e-12	8.36533e-07	1.18168e-06	8.36533e-07	1.18168e-06
svp_svp	1.20518e-06	-0.000634007	-0.000190628	0.000634007	0.000190628
svp_tzp	8.53028e-07	5.64809e-05	8.02004e-05	5.64809e-05	8.02004e-05
svp_qzp	2.79986e-08	0.00013281	3.37022e-05	0.00013281	3.37022e-05
tzp_svp	0.000126564	0.00163811	0.00233965	0.00163811	0.00233965
tzp_tzp	2.78379e-09	2.9303e-05	1.22029e-05	2.9303e-05	1.22029e-05
tzp_qzp	4.15685e-09	-1.6555e-05	-9.67065e-07	1.6555e-05	9.67065e-07
qzp_svp	0.000201524	0.00217921	0.00249911	0.00217921	0.00249911
qzp_tzp	2.45232e-07	0.000132774	6.30573e-05	0.000132774	6.30573e-05
qzp_qzp	9.87157e-12	-9.59471e-07	4.3805e-08	9.59471e-07	4.3805e-08
ccd_ccd	9.96426e-08	-0.000334306	-0.000133139	0.000334306	0.000133139
ccd_cct	2.32479e-07	0.000300912	0.00013297	0.000300912	0.00013297
ccd_ccq	1.67179e-07	0.000222038	0.00011147	0.000222038	0.00011147
cct_ccd	1.50906e-05	0.000481359	0.000668622	0.000481359	0.000668622
cct_cct	1.43889e-11	-1.11637e-06	-2.44385e-07	1.11637e-06	2.44385e-07
cct_ccq	1.11514e-08	2.24299e-05	1.36626e-05	2.24299e-05	1.36626e-05
ccq_ccd	1.22718e-05	0.000116008	0.000732735	0.000116008	0.000732735
ccq_cct	1.47316e-07	-2.48931e-05	-8.04102e-06	2.48931e-05	8.04102e-06
ccq_ccq	3.42307e-11	-4.44801e-06	-1.0335e-06	4.44801e-06	1.0335e-06
svp_svp_ri	9.55222e-07	0.0036186	0.000479538	0.0036186	0.000479538
tzp_tzp_ri	5.06478e-07	0.00282287	0.000250364	0.00282287	0.000250364
ccd_ccd_ri	1.58078e-05	0.00931011	0.00121411	0.00931011	0.00121411
cct_cct_ri	4.89076e-07	0.00165125	-1.31901e-05	0.00165125	1.31901e-05

## Sheet: LiH_FCI
ref-fit basis	ErrF	Vne rel	Jee rel	Vne rel	Jee rel
pc0_pc0	3.66772e-06	-0.000320359	-0.000111508	0.000320359	0.000111508
pc0_pc1	0.000225146	0.00109336	0.00221092	0.00109336	0.00221092
pc0_pc2	5.76233e-05	0.00133946	0.00107798	0.00133946	0.00107798
pc0_pc3	1.20178e-06	-9.93587e-05	2.08637e-06	9.93587e-05	2.08637e-06
pc1_pc0	0.00150366	0.00237462	0.00453068	0.00237462	0.00453068
pc1_pc1	7.64957e-06	7.88119e-05	9.39081e-05	7.88119e-05	9.39081e-05
pc1_pc2	1.65176e-05	-0.000650957	9.06238e-05	0.000650957	9.06238e-05
pc1_pc3	2.45461e-07	2.89972e-05	1.32155e-05	2.89972e-05	1.32155e-05
pc2_pc0	0.00161843	0.000882426	0.00361691	0.000882426	0.00361691
pc2_pc1	8.7867e-05	-0.00393544	-0.00088447	0.00393544	0.00088447
pc2_pc2	6.64718e-08	-8.17623e-05	1.95174e-05	8.17623e-05	1.95174e-05
pc2_pc3	3.51715e-07	-0.000134087	1.3332e-05	0.000134087	1.3332e-05
pc3_pc0	0.00184228	-0.000447555	0.00326058	0.000447555	0.00326058
pc3_pc1	0.000124353	-0.0046173	-0.00139737	0.0046173	0.00139737
pc3_pc2	4.16757e-06	0.00017569	0.000158597	0.00017569	0.000158597
pc3_pc3	1.53155e-09	6.1895e-06	2.01582e-06	6.1895e-06	2.01582e-06
svp_svp	5.08165e-06	9.3829e-05	0.000100893	9.3829e-05	0.000100893
svp_tzp	8.8983e-05	0.0055037	0.00238218	0.0055037	0.00238218
svp_qzp	4.35277e-07	1.99733e-05	1.97934e-05	1.99733e-05	1.97934e-05
tzp_svp	0.000144327	-0.00027242	0.00095381	0.00027242	0.00095381
tzp_tzp	2.80109e-07	-0.00012462	5.17743e-05	0.00012462	5.17743e-05
tzp_qzp	4.96925e-07	-0.000124166	2.18019e-05	0.000124166	2.18019e-05
qzp_svp	0.000187166	-0.00243397	0.000188243	0.00243397	0.000188243
qzp_tzp	6.17009e-05	-0.000174197	-1.11976e-05	0.000174197	1.11976e-05
qzp_qzp	3.13122e-09	9.2178e-06	2.72728e-06	9.2178e-06	2.72728e-06
ccd_ccd	2.8295e-06	-0.000346196	1.02672e-05	0.000346196	1.02672e-05
ccd_cct	6.1618e-06	-0.000227522	0.000100245	0.000227522	0.000100245
ccd_ccq	6.82649e-07	2.48095e-05	2.00621e-05	2.48095e-05	2.00621e-05
cct_ccd	4.25631e-05	-0.000327783	0.000394407	0.000327783	0.000394407
cct_cct	3.68628e-08	-6.02895e-06	4.03517e-06	6.02895e-06	4.03517e-06
cct_ccq	4.87709e-08	-7.33399e-05	1.10614e-07	7.33399e-05	1.10614e-07
ccq_ccd	2.79003e-05	-0.00022945	0.000330755	0.00022945	0.000330755
ccq_cct	2.25693e-06	-8.99227e-05	5.61203e-05	8.99227e-05	5.61203e-05
ccq_ccq	1.24053e-09	-1.28795e-06	1.12833e-06	1.28795e-06	1.12833e-06

## Sheet: H2_exp_opt
pcy = s6	ErrF	Delta-ErrF	exp
s1	0.0670993		0.397745
s2	0.00270236	0.0643969	1.22735	0.222408
s3	0.000229726	0.00247264	3.1428	0.671286	0.166159
s4	0.000113191	0.000116534	6.93327	1.61285	0.491447	0.142546
s5	8.11318e-05	3.20594e-05	12.5663	2.72393	0.770657	0.237437	0.074603
pcy	8.21464e-05		75.4226	11.3499	2.59926	0.73513	0.231669	0.0741474
s6	8.06752e-05	1.47121e-06	86.0135	11.537	2.67189	0.765116	0.236331	0.074519
s6a	8.11093e-05	1.03716e-06	12.6176	2.73834	0.777053	0.24368	0.085935	0.024144
s6p1	2.07563e-06	7.85996e-05	75.4317	11.1054	2.56048	0.730757	0.23067	0.075403		0.710808
s6p2	6.8426e-07	1.39137e-06	74.6691	11.3137	2.60437	0.743051	0.232841	0.074488		1.14647	0.345229
s6p3	6.8398e-07	2.8e-10	73.1113	11.2923	2.60269	0.742706	0.232714	0.074494		1.16652	0.374581	0.209599
s6p1d1	7.6412e-07	1.31151e-06	75.6043	11.4208	2.72256	0.759282	0.234739	0.076631		0.631604				1.33334
s6p1d1f1	2.049e-08	7.4363e-07	75.2277	11.3613	2.60616	0.741422	0.23334	0.074667		0.895419				1.63602		0.446036
pcx = 2s1p
s2	0.0027601		1.27476	0.186775
s3	0.00275322	6.88016e-06	1.36201	0.907039	0.184618
pcx	1.12318e-05		1.3372	0.190201			1
s2p1	5.66973e-06	5.5621e-06	1.3335	0.189552			1.04748
s3p1	4.99597e-06	6.7376e-07	1.34293	0.45604	0.188103		1.05215
s2p2	1.6677e-07	5.50296e-06	1.33692	0.190283			0.99491	0.229759
s3p2	1.2211e-07	4.87386e-06	2.55388	1.33313	0.190195		0.995632	0.233474
s2p1d1	2.6702e-07	5.40271e-06	1.33763	0.189725			1.00256			0.252864
2s2p1d	1.493e-07	1.747e-08	1.33804	0.189901			0.994231	0.243009		0.251292
2s1p1d1f	1.258e-07	1.4122e-07	1.33796	0.18975			0.99763			0.364657		0.236349
pc1 = 4s1p
s2	0.00525456		1.21671	0.227988
s3	0.00211231	0.00325288	2.34424	0.497462	0.118346
s4	0.00200168	0.000110633	13.5184	2.0111	0.470601	0.114313
s2p1	0.00300635	0.00224821	1.30397	0.231476				0.866766
s3p1	0.00016713	0.00194518	2.2795	0.463671	0.114893			1.07087
pc1	9.75018e-06		12.2519	1.86872	0.41821	0.1061		1
s4p1	1.83472e-06	7.91546e-06	12.1668	1.87854	0.425178	0.107186		1.0698
s5p1a	1.8344e-06	3.2e-10	42.1667	12.1416	1.87838	0.425187	0.107194	1.06979
s5p1b	1.82142e-06	1.33e-08	12.1913	1.88173	0.42664	0.110031	0.063147	1.0694
s4p2	4.9526e-07	1.33946e-06	12.0961	1.86883	0.422224	0.106316		0.965265	0.581931
s4p1d1	8.2411e-07	1.01061e-06	12.1711	1.87931	0.426089	0.103712		1.04071			0.262001
s4p2d1	1.422e-07	6.8191e-07	12.2518	1.91434	0.428857	0.106519		0.945381	0.630778		0.824949
s4p1d1f1	2.8051e-07	5.436e-07	12.1575	1.8759	0.426986	0.105799		0.955503			0.341614		0.408186
s4p1_p	4.94801e-06	4.80217e-06	12.2519	1.86872	0.41821	0.1061		1.06896
s4p1_s4	6.42608e-06	3.3241e-06	12.1103	1.87087	0.425897	0.108074		1
pc2 = s6p2d1
s2	0.00512416		1.22255	0.229239
s3	0.00282014	0.00230402	2.83957	0.621862	0.160588
s4	0.00273686	8.32854e-05	9.773	2.05624	0.546076	0.150191
s5	0.00272445	1.24088e-05	11.4969	2.36501	0.649561	0.211789	0.077077
s6	0.00272492	-4.6748e-07	595.778	11.6369	2.36861	0.649246	0.210942	0.075849
s6p1	8.08373e-05	0.00264408	98.3936	12.8133	2.8479	0.867417	0.261845	0.077973		0.875695
s6p2	1.04695e-05	7.03678e-05	75.2557	11.336	2.54856	0.756306	0.241351	0.078787		1.59948	0.425606
pc2	1.17961e-07		75.4226	11.3499	2.59926	0.73513	0.231669	0.0741474		1.6	0.45		1.25
s6p2d1	3.519e-08	8.27709e-08	75.2022	11.3603	2.63025	0.751103	0.235767	0.075897		1.62941	0.459496		1.31001
s6p3d1	2.803e-08	7.16e-09	74.8343	11.3732	2.6466	0.751371	0.234922	0.075631		1.61704	0.45137	0.150678	1.3056
s6p2d2	2.476e-08	1.043e-08	74.8413	11.3519	2.61237	0.764446	0.24549	0.07717		1.64052	0.468159		1.27335	0.424736
s6p2d1f1	2.972e-08	5.47e-09	74.9831	11.3618	2.63643	0.751627	0.235366	0.075615		1.57416	0.468469		1.31088		1.22744
